# Supplementary material for: Inhibition of Xenobiotics Transporters’ Efflux Ability after Nanoplastics Exposure in Larval Japanese Medaka
Source: MDPI journal article supplement (doi:10.3390/w14060863), 2022-03-10
Supplement: s1 [file s1]

Archive with 1 entries (1 files):
- water-1612263-supplementary.pdf
