# Supplementary material for: Inhibition of Xenobiotics Transporters’ Efflux Ability after Nanoplastics Exposure in Larval Japanese Medaka
Source: MDPI journal article supplement (doi:10.3390/w14060863), 2022-03-10
Supplement: s1 [file s1 › water-1612263-supplementary.pdf]

## Article

# Inhibition of Xenobiotics Transporters' Efflux Ability after Nanoplastics Exposure in Larval Japanese Medaka

Hairui Yu, Zhuo Gao, Yan Yang, Mingyuan Li and Qiqing Chen \*

State Key Laboratory of Estuarine and Coastal Research, East China Normal University, Shanghai 200241, China; yhrharry1013@163.com (H.Y.); gz1256133528@163.com (Z.G.); yy18001492078@163.com (Y.Y.); 51193904044@stu.ecnu.edu.cn (M.L.)

\* Correspondence: chenqiqing@sklec.ecnu.edu.cn

**Citation:** Yu, H.; Gao, Z.; Yang, Y.; Li, M.; Chen, Q. Inhibition of Xenobiotics Transporters Efflux Ability after Nanoplastics Exposure in Larval Japanese Medaka. *Water* **2022**, *14*, 863.

<https://doi.org/10.3390/w14060863>

Academic Editor: Anna Barra Caracciolo

Received: 10 February 2022

Accepted: 7 March 2022

Published: 10 March 2022

**Publisher's Note:** MDPI stays neutral with regard to jurisdictional claims in published maps and institutional affiliations.

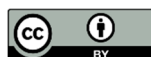

**Copyright:** © 2022 by the authors. Licensee MDPI, Basel, Switzerland. This article is an open access article distributed under the terms and conditions of the Creative Commons Attribution (CC BY) license (<https://creativecommons.org/licenses/by/4.0/>).

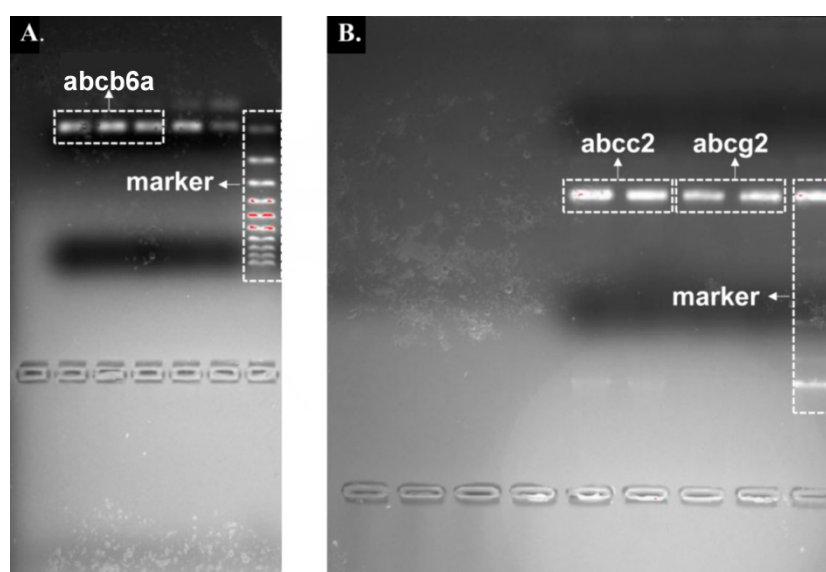

**Figure S1:** The RNA band images. (A) *abcb6a*, (B) *abcc2* and *abcg2*.
